# Supplementary material
Source: PubMed Central journal article supplement (PMC9001021)
Supplement: NIHMS1791365-supplement-1.pdf [file NIHMS1791365-supplement-1.pdf]

421

422 Supplemental Table: Univariate analysis showing unfavorable EEG and areas of diffusion  
 423 restriction are associated with poor neurologic outcome. EEG=electroencephalogram; MRI=  
 424 magnetic resonance imaging; DR= diffusion restriction; WM=white matter; PPV=positive  
 425 predictive value; NPV=negative predictive value.

| EEG or MRI characteristic                       | Number with poor outcome | P-value     | Sensitivity | Specificity | PPV  | NPV  | Univariate OR | Univariate 95% CI |
|-------------------------------------------------|--------------------------|-------------|-------------|-------------|------|------|---------------|-------------------|
| Abnormal EEG background, category 3 or 4 (n=14) | 14                       | <0.001      | 74%         | 100%        | 100% | 81%  | infinity      |                   |
| Seizures (n=7)                                  | 4                        | 0.68        | 21%         | 86%         | 57%  | 56%  | 1.7           | 0.3, 8.7          |
| Any hemorrhage (n=12)                           | 8                        | 0.17        | 42%         | 81%         | 67%  | 62%  | 3.3           | 0.8, 13.5         |
| Any DR (n=28)                                   | 19                       | <0.000<br>1 | 100%        | 59%         | 68%  | 100% | infinity      |                   |
| Cortical DR (n=18)                              | 12                       | 0.03        | 63%         | 73%         | 67%  | 70%  | 4.6           | 1.2, 17.2         |
| WM DR (n=15)                                    | 9                        | 0.21        | 47%         | 73%         | 60%  | 62%  | 2.4           | 0.7, 8.8          |
| Deep gray DR (n= 19)                            | 16                       | <0.000<br>1 | 84%         | 86%         | 85%  | 85%  | 32            | 5.6, 181.6        |
| Hippocampus DR (n=13)                           | 12                       | 0.0001      | 63%         | 95%         | 92%  | 74%  | 34.3          | 3.7, 313.8        |

426
